# Supplementary material for: Natural product isolation
Source: Royal Society of Chemistry journal article supplement (doi:10.1039/b700306b), 2008-01-01
Supplement: b700306b-S2.pdf [file b700306b-S2.pdf]

Table S2 (complete version of Table 12). Recent applications of HSCCC/HPCPC to natural product isolation from medicinal plants and algae

| Compounds                      | Matrix <sup>a</sup>                        | Solvent systems (volume ratio) <sup>b</sup>                                                                              | Mode <sup>c</sup> | MP <sup>d</sup> | Ref. <sup>e</sup> |
|--------------------------------|--------------------------------------------|--------------------------------------------------------------------------------------------------------------------------|-------------------|-----------------|-------------------|
| <b>Flavonoids</b>              |                                            |                                                                                                                          |                   |                 |                   |
| Flavonoids                     | <i>Ampelopsis grossedentata</i> , leaf     | Hex–EtOAc–MeOH–water (1:6:1.5:7.5)                                                                                       |                   | LP              | 249               |
| Flavonoids                     | <i>Byrsonima crassa</i> , leaf             | EtOAc–PrOH–water (14:0.8:8)                                                                                              |                   | UP              | 250               |
| Anthocyanins (sambubiosides)   | <i>Vaccinium myrtillus</i> , fruit         | MtBE–BuOH–CH <sub>3</sub> CN–water–TFA (1:4:1:5:0.01)                                                                    |                   | LP              | 251               |
| Flavonoids                     | <i>Patrinia villosa</i>                    | Hex–EtOAc–MeOH–water (10:11:11:8)                                                                                        |                   | LP              | 252               |
| Catechin, stilbene derivative  | <i>Rheum tanguticum</i> , root and rhizome | EtOAc–EtOH–water (25:1:25) → (5:1:5)                                                                                     | stepwise          | LP              | 253               |
| Catechin constituents          | <i>Camellia sinensis</i> cultivars, leaf   | Hex–EtOAc–MeOH–water (1:6:1:6), (1:7:1:7), (1:5:1:5), (1:6.5:1:6.5)                                                      |                   | LP              | 254               |
| Flavonoids                     | <i>Paeonia suffruticosa</i> , flower       | EtOAc–EtOH–AcOH–water (4:1:0.25:5)                                                                                       |                   | LP              | 255               |
| Baicalein, wogonin, oroxylin A | <i>Scutellaria baicalensis</i> , root      | Hex–EtOAc–BuOH–water (1:1:8:10)                                                                                          | stepwise          | LP              | 256               |
| Baicalin, wogonoside           | <i>Scutellaria baicalensis</i> , root      | EtOAc–MeOH–1% AcOH (5:0.5:5)                                                                                             |                   | LP              | 257               |
| Flavonoid glycosides           | <i>Trollius ledebouri</i> , herb           | EtOAc–BuOH–water (2:1:3)                                                                                                 |                   | LP              | 183               |
| Flavonoid glycosides           | <i>Epimedium koreanum</i> , herb           | CHCl <sub>3</sub> –MeOH–water (4:3.5:2)                                                                                  |                   | LP              | 258               |
| C-glycosylflavones             | <i>Patrinia villosa</i>                    | EtOAc–BuOH–water (2:1:3)                                                                                                 |                   | LP              | 259               |
| Flavanone glucoside            | <i>Carthamus tinctorum</i> , flower        | EtOAc–MeOH–water (5:1:5) [silica step clean-up before HSCCC]                                                             |                   | LP              | 260               |
| Flavonoids                     | <i>Salix alba</i> , bark                   | Hex–EtOAc–MeOH–water (2:2:2:3)                                                                                           |                   | LP              | 261               |
| Flavonoids                     | <i>Oroxylum indicum</i> , seed             | Hex–EtOAc–MeOH–water (1:1.2:1:1), (1:2:1:1), (1:8:1:8)                                                                   |                   | LP              | 262               |
| Astilbin, isoastilbin          | <i>Smilax glabra</i> , rhizome             | Hex–BuOH–water (1:1:2)                                                                                                   |                   | LP              | 263               |
| Flavonoid glycosides           | <i>Siparuna guianensis</i> , leaf          | Hex–EtOAc–MeOH–water (0.6:4:0.05:1) → (0.6:4:0.7:1)<br>Hex–EtOAc–BuOH–MeOH–water (0.6:4:1:0.05:1) for final purification | step-grad         | LP              | 264               |
| Astilbin, catechin, naringenin | <i>Benincasa hispida</i> , fruit           | Hex–BuOH–MeOH–water (10:16:5:20)<br>Hex–EtOAc–MeOH–water (1:1:1:1)                                                       |                   | LP              | 265               |
| Polymethoxylated flavones      | <i>Citrus reticulata</i> , fruit peel      | Hex–EtOAc–MeOH–water (1:0.8:1:1)                                                                                         |                   | LP              | 266               |

|                                                  |                                          |                                                                                              |                    |          |     |
|--------------------------------------------------|------------------------------------------|----------------------------------------------------------------------------------------------|--------------------|----------|-----|
| Liquiritigenin, isoliquiritigenin                | <i>Glycyrrhiza uralensis</i> , root      | Hex–EtOAc–MeOH–CH <sub>3</sub> CN–water (2:2:1:0.6:2)                                        |                    | LP       | 267 |
| Quercetin-3- <i>O</i> -rhamnoside                | <i>Acer truncatum</i> , leaf             | EtOAc–EtOH–water (5:1:5)                                                                     |                    | LP       | 268 |
| Flavonoid glycosides, phloroglucinol derivatives | <i>Hypericum japonicum</i> , herb        | EtOAc–EtOH–water (5:1:5)<br>Hex–EtOAc–EtOH–water (1:1.2:1.2:1)                               | stepwise<br>2 step | LP       | 269 |
| Hyperoside                                       | <i>Hypericum perforatum</i> , herb       | EtOAc–EtOH–water (5:1:5)                                                                     |                    | LP       | 270 |
| Flavonoids                                       | <i>Sophora flavescens</i>                | Hex–EtOAc–MeOH–water (1:1:1:1)                                                               |                    | LP       | 271 |
| Flavonoids                                       | <i>Patrinia villosa</i> , herb           | Hex–EtOAc–MeOH–water (5:6:6:6)                                                               | stepwise           | LP       | 28  |
| Flavonoids                                       | <i>Patrinia villosa</i> , leaf           | Hex–EtOAc–MeOH–water (10:13:13:10)                                                           |                    | LP       | 272 |
| Scutellarin                                      | <i>Erigeron breviscapus</i> , herb       | Hex–EtOAc–MeOH–AcOH–water (1:6:1.5:1:4)<br>EtOAc–BuOH–CH <sub>3</sub> CN–0.1% HCl (5:2:5:10) | 2 step             | LP       | 273 |
| Flavonoids                                       | <i>Davilla elliptica</i> , herb          | EtOAc–PrOH–water (14:0.8:8)                                                                  |                    | UP       | 274 |
| Xanthohumol                                      | <i>Humulus lupulus</i> , hop cones       | Hept–toluene–acetone–water (24.8:2.8:50:22.4)                                                | dual<br>mode       | UP<br>LP | 275 |
| Flavonoids, protocatechuic acid                  | <i>Hippophae rhamnoides</i> , fruit      | Hex–BuOH–water (1:1:2)                                                                       |                    | LP       | 276 |
| Casticin                                         | <i>Artemisia annua</i> , leaf            | Hex–EtOAc–MeOH–water (7:10:7:10)                                                             |                    | LP       | 277 |
| Hyperosid, luteolin glucoside                    | <i>Agrimonia pilosa</i>                  | EtOAc–MeOH–water (50:1:50) → (5:1:5)                                                         | stepwise           | LP       | 278 |
| Flavones, isoflavones                            | <i>Sophora japonica</i> , fruit pericarp | BuOH–acetic acid 1% (5:5), EtOAc–BuOH–acetic acid 1% (5:0.8:5)                               | 2 step             | LP       | 279 |
| Flavonoid glycosides                             | <i>Citrus reticulata</i> , fruit peel    | Hex–BuOH–MeOH–0.5% AcOH (1:3:1:4)                                                            |                    | LP       | 280 |
| Biflavonoids                                     | <i>Garcinia kola</i> , seed              | Hex–EtOAc–MeOH–water (3:5:3.5)                                                               | stepwise           | LP       | 281 |
| Flavonol glycosides                              | <i>Ginkgo biloba</i> , leaf              | Hex–EtOAc–BuOH–MeOH–0.5% AcOH (1:3.5:0.5:1:4)                                                |                    | UP       | 282 |
| Prenylflavonoids                                 | <i>Artocarpus altilis</i>                | Hex–EtOAc–MeOH–water (5:5:7:3), (5:5:6.5:3.5)                                                | MDCCC              | LP       | 283 |
| <b>Coumarins</b>                                 |                                          |                                                                                              |                    |          |     |
| Inflacoumarin A, licochalcone A                  | <i>Glycyrrhiza inflata</i> , root        | Hex–CHCl <sub>3</sub> –MeOH–water (5:6:3:2), (1.5:6:3:2)                                     | 2 step             | LP       | 284 |
| Osthol, xanthotoxol                              | <i>Cnidium monnieri</i> , fruit          | Hex–EtOAc–MeOH–water (1:1:1:1) → (5:5:6:4)                                                   | stepwise           | LP       | 285 |
| Psoralen, isopsoralen                            | <i>Psoralea corylifolia</i> , seed       | Hex–EtOAc–MeOH–water (5:5:4.5:5.5)                                                           |                    | LP       | 286 |
| Psoralen, isopsoralen                            | <i>Psoralea corylifolia</i> , fruit      | Hex–EtOAc–MeOH–water (1:0.7:1:0.8)                                                           |                    | LP       | 23  |
| Coumarins                                        | <i>Peucedanum praeruptorum</i> , root    | LtPet–EtOAc–MeOH–water (5:5:5:5) →                                                           | grad               | LP       | 287 |

|                                        |                                                         |                                                                                                         |                |    |     |
|----------------------------------------|---------------------------------------------------------|---------------------------------------------------------------------------------------------------------|----------------|----|-----|
|                                        |                                                         | (5:5:6.5:3.5)                                                                                           |                |    |     |
| Coumarins                              | <i>Cnidium monnieri</i>                                 | LtPet–EtOAc–MeOH–water (5:5:5:5) → (5:5:6:4) → (5:5:6.5:3.5)                                            | stepwise       | LP | 288 |
| Coumarins                              | <i>Angelica dahurica</i> , root                         | Hex–MeOH–water (5:5:5) → (5:7:3)                                                                        | grad           | LP | 289 |
| Bergapten, imperatorin                 | <i>Cnidium monnieri</i> , fruit                         | Hex–EtOAc–EtOH–water (5:5:5:5)                                                                          | stepwise       | LP | 290 |
| Coumarins                              | <i>Cnidium monnieri</i> , fruit                         | Hex–EtOAc–EtOH–water (5:5:4:6) → (5:5:6:4)                                                              | stepwise       | LP | 291 |
| Coumarins                              | <i>Fraxinus</i> sp., bark                               | BuOH–MeOH–0.5% AcOH (5:1.5:5)                                                                           |                | LP | 292 |
| Coumarins                              | <i>Peucedanum decursivum</i> , root                     | LtPet–EtOAc–MeOH–water (5:5:7:4)                                                                        |                | LP | 293 |
| Coumarins                              | <i>Edgeworthia chrysantha</i> , stem and bark           | Hex–EtOAc–MeOH–water (4:6:4:6)                                                                          |                | LP | 294 |
| Coumarins                              | <i>Angelica dahurica</i> , herb                         | Hex–EtOAc–MeOH–water (1:1:1:1), (5:5:4.5:5.5)                                                           | MDCCC          | LP | 295 |
| Scoparone                              | <i>Artemisia capillaries</i> , <i>A scoparia</i> , herb | Hex–EtOAc–MeOH–water (1:1:0.45:1.55)                                                                    |                | LP | 296 |
| Furanocoumarins                        | <i>Saposhnikovia divaricata</i> , root                  | CHCl <sub>3</sub> –MeOH–water (10:8:4)                                                                  |                | LP | 297 |
| Coumarins                              | <i>Angelica dahurica</i> , root                         | Hex–EtOAc–MeOH–water (5:5:4:6)                                                                          | stepwise       | LP | 298 |
| Coumarins                              | <i>Stellera chamaejasme</i> , root                      | Hex–EtOAc–MeOH–water (10:13:13:10)                                                                      | stepwise       | LP | 27  |
| <b>Phenolic compounds</b>              |                                                         |                                                                                                         |                |    |     |
| Honokiol, magnolol                     | <i>Magnolia officinalis</i> , bark                      | Hex–EtOAc–MeOH–water (1:0.4:1:0.4)                                                                      |                | LP | 299 |
| Gastrodin                              | <i>Gastrodia elata</i> , root                           | EtOAc–BuOH–water (3:2:5)                                                                                |                | LP | 300 |
| Chlorogenic acid                       | <i>Lonicera</i> sp., flower                             | BuOH–AcOH–water (4:1:5)                                                                                 | 2 step         | UP | 301 |
| Syringin, edgeworoside C               | <i>Edgeworthia chrysantha</i> , stem and bark           | EtOAc–EtOH–water (15:1:15)                                                                              |                | LP | 302 |
| Cannabinoids                           | <i>Cannabis sativa</i> , leaf                           | Hex–MeOH–water (5:3:2) acidified with 25 mM formic acid; linear grad MeOH–water from (3:2) to (4.5:0.5) | grad           | LP | 303 |
| Kava lactones                          | <i>Piper methysticum</i> , root                         | Hex–EtOAc–MeOH–water (6:5:6:5)                                                                          |                | LP | 304 |
| Phenylethanoids                        | <i>Plantago psyllium</i> , seed                         | EtOAc–water (1:1)                                                                                       | 2 step         | LP | 305 |
| Methyl gallate                         | <i>Acer truncatum</i> , leaf                            | EtOAc–EtOH–water (5:1:5)                                                                                |                | LP | 306 |
| Penylbutenoids                         | <i>Zingiber cassumunar</i> , rhizome                    | LtPet–Et <sub>2</sub> O–EtOH–water (5:2:4:1)                                                            |                | LP | 307 |
| Phenylethanoid- and iridoid glycosides | <i>Stachytarpheta cayennensis</i> , root                | EtOAc–BuOH–water (1:X:1); X = 0.05 → 0.2 → 0.5 → 1.0                                                    | step-grad      | LP | 308 |
| Prenylated phenolics                   | <i>Humulus lupulus</i> , hop cones                      | Hex–EtOAc–MeOH–water (8:2:8:2), (6:4:6:4), (5:5:5:5)                                                    | Sample cutting | LP | 135 |

|                                                    |                                            |                                                                                                                                         |                   |          |     |
|----------------------------------------------------|--------------------------------------------|-----------------------------------------------------------------------------------------------------------------------------------------|-------------------|----------|-----|
| Sucrose esters                                     | <i>Polygala tenuifolia</i> , bark          | CHCl <sub>3</sub> –MeOH–water (3:3.5:2)<br>EtOAc–BuOH–EtOH–water (4:0.6:0.6:5)                                                          |                   | LP       | 309 |
| Salvianolic acids                                  | <i>Salvia miltiorrhiza</i> , root          | Hex–EtOAc–MeOH–water (1.5:5:1.5:5)                                                                                                      |                   | LP       | 310 |
| Salvianolic acid B                                 | <i>Salvia miltiorrhiza</i>                 | 36% PrOH–8% phosphate system with the ratio between NaH <sub>2</sub> PO <sub>4</sub> : K <sub>2</sub> HPO <sub>4</sub> = 6:94           |                   | UP       | 311 |
| Curculigoside, curculigoside B                     | <i>Curculigo orchioides</i>                | EtOAc–EtOH–water (5:1:5) + additional cleaning step by D101 resin column chromatography                                                 |                   | LP       | 312 |
| Ferulic acid                                       | <i>Angelica sinensis</i> , root            | Hex–EtOAc–MeOH–water (3:7:5:5)                                                                                                          |                   | LP       | 70  |
| Honokiol, magnolol                                 | <i>Magnolia officinalis</i> , bark         | LtPet–EtOAc–CCl <sub>4</sub> –MeOH–water (1:1:8:6:1)                                                                                    |                   | LP       | 201 |
| Hydrolysable tannins                               | <i>Terminalia chebula</i> , fruit          | Hex–EtOAc–MeOH–water (1:20:1:20)                                                                                                        |                   | LP       | 313 |
| Galloyl glucose derivative                         | <i>Acer truncatum</i> , leaf               | Hex–EtOAc–MeOH–water (0.25:5:1:5)                                                                                                       |                   | LP       | 314 |
| Honokiol, magnolol                                 | <i>Magnolia officinalis</i> , bark         | Hex–EtOAc–MeOH–water (1:0.4:1:0.4)                                                                                                      |                   | UP       | 315 |
| Gallic acid                                        | <i>Punica granatum</i> , husk              | EtOAc–MeOH–water (50:1:50). Final purification by preparative liquid chromatography                                                     |                   | LP       | 316 |
| Salvianolic acid B, 3,4-dihydroxyphenyllactic acid | <i>Salvia miltiorrhiza</i> , root          | Hex–EtOAc–MeOH–acetic acid–water (1:6:1.5:1.5:8)                                                                                        |                   | LP       | 317 |
| Isomeric polyphenols                               | <i>Parthenocissus laetevirens</i> , root   | Hex–EtOAc–MeOH–water (1:2:1:2)                                                                                                          | MDCCC             | LP       | 318 |
| Dicaffeoylquinic acids                             | <i>Ainsliaea fragrans</i> , stems and leaf | CHCl <sub>3</sub> –MeOH–water (8:8:4)                                                                                                   |                   | LP       | 319 |
| Punicalagin                                        | <i>Punica granatum</i> , husk              | BuOH–TFA–water (100:1:100)                                                                                                              |                   | UP       | 320 |
| <b>Alkaloids</b>                                   |                                            |                                                                                                                                         |                   |          |     |
| Protoberberine alkaloids                           | <i>Enantia chlorantha</i> , bark           | CH <sub>2</sub> Cl <sub>2</sub> –MeOH–water (48:16:36) containing KClO <sub>4</sub> (1 <sup>st</sup> run) or NaOH (2 <sup>nd</sup> run) | 2 step, dual mode | LP<br>UP | 234 |
| Ungeremine                                         | <i>Nerine bowdenii</i> , bulb              | EtOAc–MeOH–water (45:20:35)                                                                                                             |                   | UP       | 205 |
| Evodiamine, rutaecarpine, evocarpine               | <i>Evodia rutaecarpa</i> , fruits          | Hex–EtOAc–MeOH–water (5:5:7:5)                                                                                                          |                   | LP       | 321 |
| Corydalis alkaloids                                | <i>Corydalis yanhusuo</i> , tuber          | CCl <sub>4</sub> –CHCl <sub>3</sub> –MeOH–0.2 M HCl (1:7:3:4) and CHCl <sub>3</sub> –MeOH–0.2 M HCl (7:3:4)                             |                   | LP       | 322 |
| Ricinine                                           | <i>Ricinus communis</i> , leaf             | CH <sub>2</sub> Cl <sub>2</sub> –MeOH–water (93:35:72)                                                                                  |                   | LP       | 323 |
| Diterpene alkaloids                                | <i>Aconitum coreanum</i> , root            | Hex–EtOAc–MeOH–0.2 M HCl (1:3.5:2:4.5)                                                                                                  |                   | LP       | 324 |
| Quinolizidine alkaloids                            | <i>Sophora flavescens</i> , root           | CHCl <sub>3</sub> –MeOH–2.3 × 10 <sup>-2</sup> M NaH <sub>2</sub> PO <sub>4</sub>                                                       |                   | LP       | 29  |

|                                        |                                      |                                                                                                                                  |          |    |     |
|----------------------------------------|--------------------------------------|----------------------------------------------------------------------------------------------------------------------------------|----------|----|-----|
|                                        |                                      | (27.5:20:12.5)                                                                                                                   |          |    |     |
| Verticine, verticinone                 | <i>Fritillaria thunbergii</i> , bulb | CHCl <sub>3</sub> -EtOH-0.2 mol L <sup>-1</sup> HCl (3:2:2)                                                                      |          | LP | 325 |
| Benzylisoquinoline alkaloids           | <i>Coptis chinensis</i>              | Hex-EtOAc-MeOH-1% AcOH (1:1:1:1)                                                                                                 |          | LP | 326 |
| Sesquiterpene alkaloids                | <i>Tripterygium wilfordii</i> , root | PE-EtOAc-EtOH-water (6:4:5:8)                                                                                                    |          | LP | 327 |
| <b>Antraquinones</b>                   |                                      |                                                                                                                                  |          |    |     |
| Hydroxyanthraquinones, cinnamic acid   | <i>Rheum officinale</i> , root       | SP: Ether-1% NaH <sub>2</sub> PO <sub>4</sub> (40:60); MP: 1% NaH <sub>2</sub> PO <sub>4</sub> :1% NaOH = 100:0-0:100 in 500 min | pH grad  |    | 328 |
| Anthraquinones and phenolic compounds  | <i>Polygonum cuspidatum</i> , root   | LtPet-EtOAc-MeOH-water (2:5:4:6) → I + II<br>I: LtPet-EtOAc-water (1:5:5)<br>II: LtPet-EtOAc-MeOH-water (3:5:4:6) → (3:5:7:3)    | grad     | LP | 329 |
| Anthraquinones                         | <i>Polygonum multiflorum</i> , root  | Hex-EtOAc-MeOH-water (3:7:5:5 → (9:1:5:5)<br>EtOAc-MeOH-water (50:1:50)<br>EtOAc-BuOH-water (20:1:20)                            | stepwise | LP | 330 |
| Anthraquinones                         | <i>Cassia thora</i> , seed           | Hex-EtOAc-MeOH-water (4:1:3:2)                                                                                                   |          | LP | 331 |
| Aloin A and B                          | <i>Aloe vera</i> , Aloe powder       | CHCl <sub>3</sub> -MeOH-water (4:2:3), EtOAc-MeOH-water (5:1:5), BuOH-EtOAc-water (1:3:4)                                        |          | LP | 332 |
| <b>Lignans</b>                         |                                      |                                                                                                                                  |          |    |     |
| Clemastanin B, indigoticoside A        | <i>Isatis indigotica</i> , root      | EtOAc-BuOH-water (2:7:9)                                                                                                         |          | LP | 333 |
| Phillyrin                              | <i>Forsythia suspensa</i> , fruit    | Hex-EtOAc-EtOH-water (1:9:1:9)                                                                                                   |          | LP | 334 |
| Schizandrin, gomisin A                 | <i>Schisandra chinensis</i> , fruit  | Hex-EtOAc-MeOH-water (1:0.9:0.9:1)                                                                                               |          | LP | 335 |
| Deoxyschisandrin, γ-schisandrin        | <i>Schisandra chinensis</i> , fruit  | Hex-MeOH-water (35:30:3)                                                                                                         |          | LP | 336 |
| Schisandrin, schisantherin             | <i>Schisandra chinensis</i> , fruit  | Hex-EtOAc-MeOH-water (22:8:20:20)                                                                                                |          | LP | 337 |
| Arctiin                                | <i>Arctium lappa</i> , fruit         | EtOAc-BuOH-EtOH-water (5:0.5:1:5)                                                                                                |          | UP | 338 |
| Neolignans                             | <i>Ocotea elegans</i> , stem         | Hex-EtOAc-MeOH-water (1:2:2:1)                                                                                                   |          | LP | 339 |
| Arctigenin and matairesinol            | <i>Forsythia koreana</i> , stems     | Hex-EtOAc-MeOH-water (1:1:1:1)                                                                                                   |          | LP | 340 |
| Pinoresinol diglucoside, liriiodendrin | <i>Eucommia ulmoides</i> , bark      | BuOH-AcOH-water (4:1:5)                                                                                                          |          | LP | 341 |
| <b>Saponins</b>                        |                                      |                                                                                                                                  |          |    |     |
| Glycyrrhizin                           | <i>Glycyrrhiza uralensis</i> , root  | EtOAc-MeOH-water (5:2:5)                                                                                                         |          | LP | 342 |
| Triterpene saponins                    | <i>Momordica charantia</i> , fruit   | MtBE-BuOH-MeOH-water (1:2:1.5) and                                                                                               |          | LP | 343 |

|                                    |                                                                           |                                                                                            |           |    |     |
|------------------------------------|---------------------------------------------------------------------------|--------------------------------------------------------------------------------------------|-----------|----|-----|
|                                    |                                                                           | (1:3:1:5)                                                                                  |           |    |     |
| Saponin and flavonoid glycosides   | <i>Clinopodium chinensis</i> , herb                                       | EtOAc–BuOH–water (5:0.8:5)<br>EtOAc–MeOH–water (5:1:5)                                     | 2 step    | LP | 344 |
| Ginsenosides                       | <i>Panax ginseng</i> , root                                               | CH <sub>2</sub> Cl <sub>2</sub> –MeOH–isoPrOH–water (6:6:1:4)                              |           | LP | 345 |
| Triterpene saponins                | <i>Clematis mandshurica</i> , root and rhizome                            | EtOAc–BuOH–EtOH–0.5% TFA (5:10:2:20)                                                       |           | LP | 346 |
| Cyclolanostane type saponins       | <i>Astragalus membranaceus</i> var. <i>mongholicus</i> , root and rhizome | EtOAc–2-PrOH–water (5:1:5) and (50:1:50)                                                   | 2 step    | LP | 347 |
| <b>Terpenoids</b>                  |                                                                           |                                                                                            |           |    |     |
| Triterpenoids                      | <i>Centella asiatica</i> , herb                                           | Hex–BuOH–0.05 M NaOH (5:1:6) → (1:1:X) → (1:2:X) → (1:4:X); X = saturated with 0.05 M NaOH | step-grad | UP | 348 |
| Celastrol                          | <i>Celastrus orbiculatus</i> , root                                       | LtPet–EtOAc–CCl <sub>4</sub> –methanol–water (1:1:8:6:1)                                   |           | LP | 146 |
| Geniposide                         | <i>Gardenia jasminoides</i>                                               | EtOAc–BuOH–water (2:1.5:3)                                                                 |           | LP | 349 |
| Rupestonic acid                    | <i>Artemisia rupestris</i> , root                                         | Hex–EtOAc–MeOH–water (6:4:3.5:6.5) with 0.5% AcOH in stationary phase                      | 2 step    | LP | 350 |
| Costunolide, dehydrocostuslactone  | <i>Aucklandia lappa</i> , root                                            | LtPet–MeOH–water (5:6.5:3.5)                                                               |           | LP | 351 |
| Germacrone, curdione               | <i>Curcuma wenyujin</i> , rhizome                                         | LtPet–Et <sub>2</sub> O–EtOH–water (5:0.5:4:1)                                             |           | LP | 352 |
| Zeaxanthin                         | <i>Microcystis aeruginosa</i>                                             | Hex–EtOAc–EtOH–water (8:2:7:3)                                                             |           | LP | 353 |
| Triterpenes                        | <i>Cecropia lyratiloba</i> , root                                         | Hex–EtOAc–MeOH–water (1:2:X:1); X = 0.5 → 0.75 → 1.0 → 1.5 → 2.0                           | step-grad | LP | 354 |
| Harpagoside                        | <i>Scrophularia ningpoensis</i> , root                                    | EtOAc–BuOH–water (9:1:10)                                                                  |           | LP | 355 |
| Linderalactone, lindenenol         | <i>Lindera strychnifolia</i> , root                                       | LtPet–EtOAc–MeOH–water (5:5:6:4)                                                           |           | LP | 356 |
| Pentacyclic triterpene acids       | <i>Diospyros kaki</i> , leaf                                              | Hex–EtOAc–MeOH–water (3:6:4:2)                                                             |           | LP | 357 |
| Oridonin (diterpenoid)             | <i>Rabdosia rubescens</i>                                                 | Hex–EtOAc–MeOH–water (1:2:1:2)                                                             |           | LP | 358 |
| Canthaxanthin                      | <i>Chlorella zofingiensis</i>                                             | Hex–EtOH–water (10:9:1)                                                                    |           | LP | 359 |
| Triterpenoids                      | <i>Adenophora tetraphylla</i> , root                                      | Hex–EtOAc–CH <sub>3</sub> CN (5:1:5), (5:1:4), (5:2:5)<br>LtPet–EtOAc–EtOH–water (6:4:5:5) |           | LP | 360 |
| Secoiridoids                       | <i>Gentiana scabra</i> , herb                                             | Hex–BuOH–MeOH–0.4% AcOH (1.4:8:3:15.5)                                                     |           | LP | 361 |
| Diterpenoids (oridonin, ponigidin) | <i>Rabdosia rubescens</i>                                                 | Hex–EtOAc–MeOH–water (1:5:1:5), (3:5:3:5)                                                  | MDCCC     | LP | 362 |
| Geniposide                         | <i>Gardenia jasminoides</i> , fruits                                      | EtOAc–isoPrOH–water (3:2:5)                                                                |           | LP | 363 |

|                                                                                     |                                                               |                                                                                                                                                                    |           |          |     |
|-------------------------------------------------------------------------------------|---------------------------------------------------------------|--------------------------------------------------------------------------------------------------------------------------------------------------------------------|-----------|----------|-----|
| Sesquiterpene lactones                                                              | <i>Xanthium macrocarpum</i> , leaf                            | Hept–EtOAc–MeOH–water (1:1:1:1)                                                                                                                                    |           | UP       | 364 |
| <b>Miscellaneous</b>                                                                |                                                               |                                                                                                                                                                    |           |          |     |
| Shikonin                                                                            | <i>Lithospermum erythrorhizon</i> , root                      | Hex–EtOAc–EtOH–water (16:14:14:5)                                                                                                                                  |           | LP       | 365 |
| Chuanxiongine                                                                       | <i>Ligusticum chuanxiong</i> , root                           | Hex–EtOAc–EtOH–water (5:5:3:7)                                                                                                                                     |           | LP       | 366 |
| Isoflavan and pterocarpan glycosides                                                | <i>Astragalus membranaceus</i> var. <i>mongholicus</i> , root | EtOAc–EtOH–AcOH–water (4:1:0.25:5)                                                                                                                                 |           | LP       | 367 |
| Tripdiolide                                                                         | <i>Tripterygium wilfordii</i> , herb                          | Hex–CH <sub>2</sub> Cl <sub>2</sub> –MeOH–water (3:22:17:8),<br>CHCl <sub>3</sub> –MeOH–water (4:3:2)                                                              | MDCCC     | LP       | 368 |
| Aurentiamide acetate                                                                | <i>Patrinia villosa</i>                                       | Hex–EtOAc–MeOH–water (1:1.2:1.2:1)                                                                                                                                 |           | LP       | 26  |
| Chromone                                                                            | <i>Aloe vera</i> , leaf                                       | CH <sub>2</sub> Cl <sub>2</sub> –MeOH–water (5:4:2)<br>Hex–EtOAc–MeOH–water (1:5:1:5)                                                                              |           | LP       | 369 |
| Napthoquinones                                                                      | <i>Plumbago auriculata</i> , root                             | Hex–EtOAc–MeOH–water (40:10:10:2)                                                                                                                                  | dual mode | UP<br>LP | 370 |
| Atractylon, atractylenolide III                                                     | <i>Atractylodes macrocephala</i> , root                       | LtPet–EtOAc–EtOH–water (4:1:4:1)                                                                                                                                   | dual mode | LP<br>UP | 371 |
| Trisaccharide fatty acid esters                                                     | <i>Morinda citrifolia</i> , fruit                             | BuOH–water (1:1)                                                                                                                                                   |           | LP       | 372 |
| Mangiferin, neomangiferin, <i>cis</i> -hinkiresinol, (–)-4'- <i>O</i> -methylnyasol | <i>Anemarrhena asphodeloides</i> , root                       | BuOH–1% AcOH (1:1) [Mangiferin, neomangiferin]<br>LtPet–EtOAc–MeOH–water (1:1:1.2:0.8) → (1:1:1.4:0.6) [ <i>cis</i> -hinkiresinol, (–)-4'- <i>O</i> -methylnyasol] | grad      | LP       | 373 |
| Mangiferin                                                                          | <i>Anemarrhena asphodeloides</i> , rhizome                    | EtOAc–isoPrOH–water (3:2:5)                                                                                                                                        |           | LP       | 374 |
| Phthalides                                                                          | <i>Ligusticum chuanxiong</i> , root                           | Hex–EtOAc–MeOH–CH <sub>3</sub> CN–water (8:2:5:3:5)                                                                                                                |           | LP       | 375 |
| Amygdalin                                                                           | <i>Prunus armeniaca</i> , seed                                | EtOAc–BuOH–water (1:4:6)                                                                                                                                           |           | LP       | 376 |
| Gambogic acid, epigambogic acid                                                     | <i>Garcinia hanburyi</i>                                      | Hex–MeOH–water (5:4:1)                                                                                                                                             | MDCCC     | LP       | 377 |
| Mangiferin, neomangiferin, 5-HMF                                                    | <i>Anemarrhena asphodeloides</i>                              | BuOH–water (1:1)                                                                                                                                                   | stepwise  | LP       | 378 |
| Cyclic peptide (pseudostellarin B)                                                  | <i>Pseudostellaria heterophylla</i> , root                    | EtOAc–BuOH–water (4.4:0.6:5)                                                                                                                                       |           | LP       | 379 |
| Mollugin                                                                            | <i>Rubia cordifolia</i> , root                                | LtPet–Et <sub>2</sub> O–EtOH–water (5:3:4:1)                                                                                                                       |           | LP       | 380 |

<sup>a</sup> Systematic plant name and crude drug.

- <sup>b</sup> AcOH: acetic acid; CH<sub>3</sub>CN: acetonitrile; BuOH: 1-butanol; CHCl<sub>3</sub>: chloroform; CH<sub>2</sub>Cl<sub>2</sub>: methylene chloride; CCl<sub>4</sub>: carbon tetrachloride; Et<sub>2</sub>O: diethyl ether; EtOAc: ethyl acetate; EtOH: ethanol; Hept: heptane; Hex: n-hexane; LtPet: light petroleum; MtBE: methyl *tert*-butyl ether; MeOH: methanol; PE: petroleum ether; PrOH: propanol; TFA: trifluoroacetic acid.
- <sup>c</sup> 2 step: two step elution using either twice the same, or different solvent systems. Between 2 steps, the sample is dried and re-dissolved. Stepwise: either by changing the solvent (→) or by increasing the flow-rate of the solvent. Grad: linear gradient elution. Step-grad: step gradient elution (→). Dual mode: dual-mode elution (LP → UP, or reversed). MDCCC: multidimensional CCC.
- <sup>d</sup> LP: lower phase; MP: mobile phase; UP: upper phase.
- <sup>e</sup> References: 2004–2007.
